# Supplementary material for: Use of a focus group-based cognitive interview methodology to validate a cooking behavior survey among African-American adults
Source: PubMed Central journal article supplement (PMC9760831; doi:10.3389/fnut.2022.1000258), 2022-12-05
Supplement: Image_2.pdf [file Image_2.pdf]

# Cooking Survey for Community Based Health and Needs Assessment

Today's Date: \_\_\_\_\_

Start time: \_\_\_\_\_ Stop time: \_\_\_\_\_

The questions in this survey will ask about your beliefs and practices surrounding cooking within your home and food shopping. Your answers will help to inform our research team about the design of future nutrition interventions. For each question, please check if you find the question easy or difficult to answer.

The first set of questions are about the time you spend doing different types of cooking activity in a typical week. In answering the following questions, your household is the entire group of persons living in your home; they may or may not be your family members.

1. How would you rate your diet?

Make 1<sup>st</sup> question

- Excellent
- Very Good
- Good
- Fair
- Poor

1. Do you cook ? (Combination of old Q 1 and 2)

- Yes
- No \_\_\_\_\_,

If your answer is No, please skip to Question 12

| Assessment Key                |                                    |
|-------------------------------|------------------------------------|
| <input type="checkbox"/> Easy | <input type="checkbox"/> Difficult |

2. What days of the week do you cook? Please check all that apply.

- Monday       Tuesday       Wednesday
- Thursday       Friday       Saturday
- Sunday

3. Do you batch cook (make large amounts of food to eat later) meals in advance?

- Yes       No (\*added to replace old Q.3)

4. How many adults and children do you or someone in your household usually prepare food for on a daily basis?

## Cooking Survey for Community Based Health and Needs Assessment

Enter number of people \_\_\_\_\_  
 Don't know

| Assessment Key                |                                    |
|-------------------------------|------------------------------------|
| <input type="checkbox"/> Easy | <input type="checkbox"/> Difficult |

For the next three questions, think about the past 7 days and about your usual or day-to-day routine.

5. During the **past 7 days**, how many times did you (or someone else in your family) cook food for dinner (or supper) at home?

0    1    2    3    4    5    6    7

| Assessment Key                |                                    |
|-------------------------------|------------------------------------|
| <input type="checkbox"/> Easy | <input type="checkbox"/> Difficult |

6. How much time do you or someone in your family usually spend on cooking dinner or supper?

Hours: minutes: \_\_\_hrs : \_\_\_mins  
 Don't know

| Assessment Key                |                                    |
|-------------------------------|------------------------------------|
| <input type="checkbox"/> Easy | <input type="checkbox"/> Difficult |

7. How much time do you or someone in your family usually spend on cleaning up after cooking dinner?

Hours: minutes: \_\_\_hrs : \_\_\_mins  
 Don't know

| Assessment Key                |                                    |
|-------------------------------|------------------------------------|
| <input type="checkbox"/> Easy | <input type="checkbox"/> Difficult |

Most people use different ways to prepare meals, the following questions will ask about your day-to-day cooking habits.

8. During the **past month** how often did you do the following?

|                                                                                             | Not at all               | 1-2 times during the past month | Once a week              | Several times each week  | About everyday           |
|---------------------------------------------------------------------------------------------|--------------------------|---------------------------------|--------------------------|--------------------------|--------------------------|
| a. Prepare meals from basic "scratch" ingredients, such as whole fresh produce, raw chicken | <input type="checkbox"/> | <input type="checkbox"/>        | <input type="checkbox"/> | <input type="checkbox"/> | <input type="checkbox"/> |

## Cooking Survey for Community Based Health and Needs Assessment

|                                                                                                                                            | Not at all               | 1-2 times during the past month | Once a week              | Several times each week  | About everyday           |
|--------------------------------------------------------------------------------------------------------------------------------------------|--------------------------|---------------------------------|--------------------------|--------------------------|--------------------------|
| b. Prepare meals using convenience items, such as bagged salad, prepared mashed potatoes, pre-shredded vegetables, deli rotisserie chicken | <input type="checkbox"/> | <input type="checkbox"/>        | <input type="checkbox"/> | <input type="checkbox"/> | <input type="checkbox"/> |
|                                                                                                                                            |                          |                                 |                          |                          |                          |
|                                                                                                                                            | Not at all               | 1-2 times during the past month | Once a week              | Several times each week  | About everyday           |
| c. Reheat or use leftovers in another meal                                                                                                 | <input type="checkbox"/> | <input type="checkbox"/>        | <input type="checkbox"/> | <input type="checkbox"/> | <input type="checkbox"/> |

| Assessment Key                |                                    |
|-------------------------------|------------------------------------|
| <input type="checkbox"/> Easy | <input type="checkbox"/> Difficult |

9. Merged with Q. 11

| Assessment Key                |                                    |
|-------------------------------|------------------------------------|
| <input type="checkbox"/> Easy | <input type="checkbox"/> Difficult |

10. The next group of questions ask about your confidence with different cooking **techniques**.

Think about which practice/habits you use at home, then please rate your confidence with using the cooking technique.

If you do **not** do the practice at all at home, please check I do not do at all.

a. Boiling

|                            |                            |                            |                            |                            |                            |                            |                            |                            |
|----------------------------|----------------------------|----------------------------|----------------------------|----------------------------|----------------------------|----------------------------|----------------------------|----------------------------|
| <input type="checkbox"/> 1 | <input type="checkbox"/> 2 | <input type="checkbox"/> 3 | <input type="checkbox"/> 4 | <input type="checkbox"/> 5 | <input type="checkbox"/> 6 | <input type="checkbox"/> 7 | <input type="checkbox"/> 8 | <input type="checkbox"/> 9 |
| Not at all                 |                            | Slightly                   |                            | Moderately                 |                            | Very much                  |                            | Completely                 |
| Confident                  |                            |                            |                            |                            |                            |                            |                            | Confident                  |

I do not at all

b. Simmering (staying just below the boiling point when cooking)

## Cooking Survey for Community Based Health and Needs Assessment

1    2    3    4    5    6    7    8    9  
Not at all   Slightly   Moderately   Very much   Completely  
Confident  
 I do not at all

### c. Steaming

1    2    3    4    5    6    7    8    9  
Not at all   Slightly   Moderately   Very much   Completely  
Confident  
 I do not at all

### d. Deep frying

1    2    3    4    5    6    7    8    9  
Not at all   Slightly   Moderately   Very much   Completely  
Confident  
 I do not at all

### e. Sauteing (fry quickly in a little hot fat)

1    2    3    4    5    6    7    8    9  
Not at all   Slightly   Moderately   Very much   Completely  
Confident  
 I do not at all

### g. Stir-frying (frying meat, fish, or vegetables rapidly over a high heat while stirring briskly)

1    2    3    4    5    6    7    8    9  
Not at all   Slightly   Moderately   Very much   Completely  
Confident  
 I do not at all

### f. Grilling

1    2    3    4    5    6    7    8    9  
Not at all   Slightly   Moderately   Very much   Completely  
Confident

## Cooking Survey for Community Based Health and Needs Assessment

I do not at all

g. Poaching (staying just below boiling point to cook in a small amount of liquid)

1     2     3     4     5     6     7     8     9  
 Not at all    Slightly    Moderately    Very much    Completely  
 Confident    Confident

I do not at all

h. Baking

1     2     3     4     5     6     7     8     9  
 Not at all    Slightly    Moderately    Very much    Completely  
 Confident    Confident

I do not at all

| Assessment Key                |                                    |
|-------------------------------|------------------------------------|
| <input type="checkbox"/> Easy | <input type="checkbox"/> Difficult |

11. The next question is regarding your **confidence** with different **cooking practices**.

Think about which practice/habits you use at home, then please rate your confidence with using the cooking practice/habit.

If you do **not** do the practice at all at home, please check I do not do at all.

a. Cooking from basic ingredients (example: whole lettuce heads, fresh tomatoes, raw chicken)

1     2     3     4     5     6     7     8     9  
 Not at all    Slightly    Moderately    Very much    Completely  
 Confident    Confident

I do not at all

b. Follow a new recipe or cook with new foods (example: preparing fresh salsa from tomatoes, onion, garlic, peppers)

1     2     3     4     5     6     7     8     9  
 Not at all    Slightly    Moderately    Very much    Completely  
 Confident    Confident

I do not at all

## Cooking Survey for Community Based Health and Needs Assessment

c. How confident are you about adapting recipes to your food preferences or to preferences of others?

1     2     3     4     5     6     7     8     9  
Not at all                      Slightly                      Moderately                      Very much                      Completely Confident

I do not at all

d. Use knife skills (chopping) in the kitchen to chop vegetables, not necessarily with a cutting board

1     2     3     4     5     6     7     8     9  
Not at all                      Slightly                      Moderately                      Very much                      Completely Confident

I do not at all

e. Prepare and cook fresh or frozen green vegetables

1     2     3     4     5     6     7     8     9  
Not at all                      Slightly                      Moderately                      Very much                      Completely Confident

I do not at all

f. Prepare and cook root vegetables (potatoes, beets, sweet potatoes)

1     2     3     4     5     6     7     8     9  
Not at all                      Slightly                      Moderately                      Very much                      Completely Confident

I do not at all

g. Prepare and cooking raw meat/poultry

1     2     3     4     5     6     7     8     9  
Not at all                      Slightly                      Moderately                      Very much                      Completely Confident

I do not at all

h. Prepare and cook raw fish

## Cooking Survey for Community Based Health and Needs Assessment

1     2     3     4     5     6     7     8     9  
 Not at all                      Slightly                      Moderately                      Very much                      Completely  
 Confident  
 I do not at all

i. Make sauces and gravy from scratch

1     2     3     4     5     6     7     8     9  
 Not at all                      Slightly                      Moderately                      Very much                      Completely  
 Confident  
 I do not at all

j. Use herbs and spices (fresh or dry) to flavor food

1     2     3     4     5     6     7     8     9  
 Not at all                      Slightly                      Moderately                      Very much                      Completely  
 Confident  
 I do not at all

| Assessment Key                |                                    |
|-------------------------------|------------------------------------|
| <input type="checkbox"/> Easy | <input type="checkbox"/> Difficult |

12. Below are several different food **shopping practices**, please think about which practice you use when food shopping and rate your confidence. If you do not do the shopping practice asked, please check I do not do all.

a. Shopping with a grocery list

I do not at all

1     2     3     4     5     6     7     8     9  
 Not at all                      Slightly                      Moderately                      Very much                      Completely  
 Confident  
 Confident

b. Shop for ingredients with specific meals in mind

I do not at all

1     2     3     4     5     6     7     8     9  
 Not at all                      Slightly                      Moderately                      Very much                      Completely  
 Confident  
 Confident

## Cooking Survey for Community Based Health and Needs Assessment

c. Planning how much food to buy

I do not at all

1    2    3    4    5    6    7    8    9  
Not at all   Slightly   Moderately   Very much   Completely  
Confident   Confident

d. Comparing prices before you buy food

I do not at all

1    2    3    4    5    6    7    8    9  
Not at all   Slightly   Moderately   Very much   Completely  
Confident   Confident

e. Knowing what budget you have to spend on food

I do not at all

1    2    3    4    5    6    7    8    9  
Not at all   Slightly   Moderately   Very much   Completely  
Confident   Confident

f. Buying food in season to save money

I do not at all

1    2    3    4    5    6    7    8    9  
Not at all   Slightly   Moderately   Very much   Completely  
Confident   Confident

g. Buying more economical cuts of meat to save money

I do not at all

1    2    3    4    5    6    7    8    9  
Not at all   Slightly   Moderately   Very much   Completely  
Confident   Confident

h. Using leftovers to create another meal

I do not at all

1    2    3    4    5    6    7    8    9  
Not at all   Slightly   Moderately   Very much   Completely  
Confident   Confident

i. Keeping basic items in your cupboard for putting meals together



## Cooking Survey for Community Based Health and Needs Assessment

I do not at all

1    2    3    4    5    6    7    8    9  
 Not at all   Slightly   Moderately   Very much   Completely  
 Confident   Confident

j. Reading the storage location, use by date or expiration date on food packets

I do not at all

1    2    3    4    5    6    7    8    9  
 Not at all   Slightly   Moderately   Very much   Completely  
 Confident   Confident

k. Reading the nutrition information on food labels

I do not at all

1    2    3    4    5    6    7    8    9  
 Not at all   Slightly   Moderately   Very much   Completely  
 Confident   Confident

l. Balancing meals based on nutrition advice of what is healthy

I do not at all

1    2    3    4    5    6    7    8    9  
 Not at all   Slightly   Moderately   Very much   Completely  
 Confident   Confident

m. Buying organic foods

### Assessment Key

Easy    Difficult

If you answered that you do not cook in Question 1, then skip to Question 24-28.

13. I can time different parts of a dish to come together at the same time?

Yes    No    Don't know

### Assessment Key

Easy    Difficult

14. I can prepare or cook a meal in a limited amount of time (30 minutes)

Yes    No    Don't know

### Assessment Key

Easy    Difficult

15. I can cook more or double a serving from a recipe to use in a meal

### Assessment Key

## Cooking Survey for Community Based Health and Needs Assessment

Yes       No       Don't know

|                               |                                    |
|-------------------------------|------------------------------------|
| <input type="checkbox"/> Easy | <input type="checkbox"/> Difficult |
|-------------------------------|------------------------------------|

16. I can prepare or cook a healthy meal with only a few ingredients on hand

Yes       No       Don't know

| Assessment Key                |                                    |
|-------------------------------|------------------------------------|
| <input type="checkbox"/> Easy | <input type="checkbox"/> Difficult |

17. Everyone's definition of cooking is different. Below are some examples of different ways people prepare meals. Think for a moment about how you define cooking, then indicate if you agree or disagree that the following activities are cooking.

|                                                                                                               | Disagree                 | Agree                    |
|---------------------------------------------------------------------------------------------------------------|--------------------------|--------------------------|
| a. Using boiling water to make pasta or noodles with sauce from a jar                                         | <input type="checkbox"/> | <input type="checkbox"/> |
| b. Using an oven to heat up store bought frozen or packaged items such as chicken nuggets, French fries, fish | <input type="checkbox"/> | <input type="checkbox"/> |
| c. Making a salad with already-cut, washed, bagged ingredients and store-bought salad dressing                | <input type="checkbox"/> | <input type="checkbox"/> |
| d. Making something on the stove or oven using mostly scratch or fresh ingredients                            | <input type="checkbox"/> | <input type="checkbox"/> |
| e. Using boiling water to make pasta or noodles using fresh ingredients for the sauce                         | <input type="checkbox"/> | <input type="checkbox"/> |
| f. Chopped fresh vegetables to make a salad and use homemade salad dressing                                   | <input type="checkbox"/> | <input type="checkbox"/> |
| g. Use a microwave to defrost frozen meals                                                                    | <input type="checkbox"/> | <input type="checkbox"/> |

| Assessment Key                |                                    |
|-------------------------------|------------------------------------|
| <input type="checkbox"/> Easy | <input type="checkbox"/> Difficult |

18. The following questions are about your **thoughts on cooking at home**. Indicate how strongly you agree or disagree with each statement:

|                                                                 | Strongly Disagree        | Disagree                 | Neutral                  | Agree                    | Strongly Agree           |
|-----------------------------------------------------------------|--------------------------|--------------------------|--------------------------|--------------------------|--------------------------|
| a. At home, I preferably eat meals that can be prepared quickly | <input type="checkbox"/> | <input type="checkbox"/> | <input type="checkbox"/> | <input type="checkbox"/> | <input type="checkbox"/> |
| b. The less I have to think about preparing a meal, the better  | <input type="checkbox"/> | <input type="checkbox"/> | <input type="checkbox"/> | <input type="checkbox"/> | <input type="checkbox"/> |

## Cooking Survey for Community Based Health and Needs Assessment

|                                                                        | Strongly Disagree        | Disagree                 | Neutral                  | Agree                    | Strongly Agree           |
|------------------------------------------------------------------------|--------------------------|--------------------------|--------------------------|--------------------------|--------------------------|
| c. It is easy to prepare meals                                         | <input type="checkbox"/> | <input type="checkbox"/> | <input type="checkbox"/> | <input type="checkbox"/> | <input type="checkbox"/> |
| d. I do not like to cook because it takes too much time                | <input type="checkbox"/> | <input type="checkbox"/> | <input type="checkbox"/> | <input type="checkbox"/> | <input type="checkbox"/> |
| e. Cooking meals is a good use of my time                              | <input type="checkbox"/> | <input type="checkbox"/> | <input type="checkbox"/> | <input type="checkbox"/> | <input type="checkbox"/> |
|                                                                        |                          |                          |                          |                          |                          |
|                                                                        | Strongly Disagree        | Disagree                 | Neutral                  | Agree                    | Strongly Agree           |
| f. Cooking at home costs too much                                      | <input type="checkbox"/> | <input type="checkbox"/> | <input type="checkbox"/> | <input type="checkbox"/> | <input type="checkbox"/> |
| g. Meals made at home are affordable                                   | <input type="checkbox"/> | <input type="checkbox"/> | <input type="checkbox"/> | <input type="checkbox"/> | <input type="checkbox"/> |
| h. It is not important that I know how to cook                         | <input type="checkbox"/> | <input type="checkbox"/> | <input type="checkbox"/> | <input type="checkbox"/> | <input type="checkbox"/> |
| i. It is important to eat the recommended 2 ½ cups of vegetables a day | <input type="checkbox"/> | <input type="checkbox"/> | <input type="checkbox"/> | <input type="checkbox"/> | <input type="checkbox"/> |
| j. My health is dependent on how and what I eat                        | <input type="checkbox"/> | <input type="checkbox"/> | <input type="checkbox"/> | <input type="checkbox"/> | <input type="checkbox"/> |
| k. Making meals at home helps me to eat more healthfully               | <input type="checkbox"/> | <input type="checkbox"/> | <input type="checkbox"/> | <input type="checkbox"/> | <input type="checkbox"/> |
|                                                                        |                          |                          |                          |                          |                          |
|                                                                        | Strongly Disagree        | Disagree                 | Neutral                  | Agree                    | Strongly Agree           |
| l. Cooking is an important type of relaxation for me                   | <input type="checkbox"/> | <input type="checkbox"/> | <input type="checkbox"/> | <input type="checkbox"/> | <input type="checkbox"/> |
| m. I enjoy cooking                                                     | <input type="checkbox"/> | <input type="checkbox"/> | <input type="checkbox"/> | <input type="checkbox"/> | <input type="checkbox"/> |
| n. I enjoy cooking for others                                          | <input type="checkbox"/> | <input type="checkbox"/> | <input type="checkbox"/> | <input type="checkbox"/> | <input type="checkbox"/> |
| o. Cooking at home is stressful                                        | <input type="checkbox"/> | <input type="checkbox"/> | <input type="checkbox"/> | <input type="checkbox"/> | <input type="checkbox"/> |
| p. Cooking is frustrating                                              | <input type="checkbox"/> | <input type="checkbox"/> | <input type="checkbox"/> | <input type="checkbox"/> | <input type="checkbox"/> |
| q. Cooking is fun                                                      | <input type="checkbox"/> | <input type="checkbox"/> | <input type="checkbox"/> | <input type="checkbox"/> | <input type="checkbox"/> |
| r. Cooking is interesting                                              | <input type="checkbox"/> | <input type="checkbox"/> | <input type="checkbox"/> | <input type="checkbox"/> | <input type="checkbox"/> |
| s. I find cooking tiring                                               | <input type="checkbox"/> | <input type="checkbox"/> | <input type="checkbox"/> | <input type="checkbox"/> | <input type="checkbox"/> |

| Assessment Key                |                                    |
|-------------------------------|------------------------------------|
| <input type="checkbox"/> Easy | <input type="checkbox"/> Difficult |

19. The following questions are about your **thoughts on your personal cooking habits**. Indicate how strongly you agree or disagree with each statement:

|                              | Strongly Disagree        | Disagree                 | Neutral                  | Agree                    | Strongly Agree           |
|------------------------------|--------------------------|--------------------------|--------------------------|--------------------------|--------------------------|
| a. I like trying new recipes | <input type="checkbox"/> | <input type="checkbox"/> | <input type="checkbox"/> | <input type="checkbox"/> | <input type="checkbox"/> |

## Cooking Survey for Community Based Health and Needs Assessment

|                                                                                                                             | Strongly Disagree        | Disagree                 | Neutral                  | Agree                    | Strongly Agree           |
|-----------------------------------------------------------------------------------------------------------------------------|--------------------------|--------------------------|--------------------------|--------------------------|--------------------------|
| b. I feel satisfied when I cook                                                                                             | <input type="checkbox"/> | <input type="checkbox"/> | <input type="checkbox"/> | <input type="checkbox"/> | <input type="checkbox"/> |
| c. I know how to cook                                                                                                       | <input type="checkbox"/> | <input type="checkbox"/> | <input type="checkbox"/> | <input type="checkbox"/> | <input type="checkbox"/> |
| d. I am confident that whatever I cook will turn out well                                                                   | <input type="checkbox"/> | <input type="checkbox"/> | <input type="checkbox"/> | <input type="checkbox"/> | <input type="checkbox"/> |
| e. I identify myself as a cook                                                                                              | <input type="checkbox"/> | <input type="checkbox"/> | <input type="checkbox"/> | <input type="checkbox"/> | <input type="checkbox"/> |
| f. I know how to create home-made meals that both satisfy my family and do not involve convenience foods.                   | <input type="checkbox"/> | <input type="checkbox"/> | <input type="checkbox"/> | <input type="checkbox"/> | <input type="checkbox"/> |
| g. I do not need to use measuring devices (ex: cups, tablespoon, teaspoon, scale) when I cook or create meals from scratch. | <input type="checkbox"/> | <input type="checkbox"/> | <input type="checkbox"/> | <input type="checkbox"/> | <input type="checkbox"/> |
| h. I know how long certain food items (potatoes, meat, lasagna) will take to cook.                                          | <input type="checkbox"/> | <input type="checkbox"/> | <input type="checkbox"/> | <input type="checkbox"/> | <input type="checkbox"/> |
| i. I am flexible and can make a meal out of whatever ingredients I have within the house.                                   | <input type="checkbox"/> | <input type="checkbox"/> | <input type="checkbox"/> | <input type="checkbox"/> | <input type="checkbox"/> |
| j. I can buy healthy foods for my family on a budget.                                                                       | <input type="checkbox"/> | <input type="checkbox"/> | <input type="checkbox"/> | <input type="checkbox"/> | <input type="checkbox"/> |
| k. I can cook healthy foods for my family on a budget.                                                                      | <input type="checkbox"/> | <input type="checkbox"/> | <input type="checkbox"/> | <input type="checkbox"/> | <input type="checkbox"/> |
| l. I can help my family eat more healthy.                                                                                   | <input type="checkbox"/> | <input type="checkbox"/> | <input type="checkbox"/> | <input type="checkbox"/> | <input type="checkbox"/> |
| m. When possible, I prefer to buy organic foods (meat, produce)                                                             | <input type="checkbox"/> | <input type="checkbox"/> | <input type="checkbox"/> | <input type="checkbox"/> | <input type="checkbox"/> |
| n. I like to enhance my kitchen to make cooking enjoyable                                                                   | <input type="checkbox"/> | <input type="checkbox"/> | <input type="checkbox"/> | <input type="checkbox"/> | <input type="checkbox"/> |

20. Do you remember the age when you started to cook, if so please state the age.

\_\_\_\_\_

| Assessment Key                |                                    |
|-------------------------------|------------------------------------|
| <input type="checkbox"/> Easy | <input type="checkbox"/> Difficult |

## Cooking Survey for Community Based Health and Needs Assessment

21. What important factors contributed to the development of your cooking habits.

You may select more than one choice.

- Mother                       Father                       Family member (non-parent)  
 Friends/Neighbors                       T.V. shows                       Magazines  
 Cookbooks                       Grandparent (non-parent)                       Cooking classes  
 Home-economics                       Self                       On-line blog/website  
 Online video/apps                       No important factors

| Assessment Key                |                                    |
|-------------------------------|------------------------------------|
| <input type="checkbox"/> Easy | <input type="checkbox"/> Difficult |

22. Who do you discuss cooking with?

- Family                       Friends                       Neighbors  
 No one

| Assessment Key                |                                    |
|-------------------------------|------------------------------------|
| <input type="checkbox"/> Easy | <input type="checkbox"/> Difficult |

23. Do you use any sources of recipes or ideas when you cook?  
If so, please select all of the choices that you use.

- Cookbooks                       Websites or blogs  
 Magazines                       Family member(s)  
 Friends                       Neighbors  
 Health professional(s)                       Online apps/videos  
 Online blog/website                       Myself

| Assessment Key                |                                    |
|-------------------------------|------------------------------------|
| <input type="checkbox"/> Easy | <input type="checkbox"/> Difficult |

24. Do you post messages/photos about cooking on social media (examples Pinterest, Instagram, twitter)?

Between Q. 23 and 24

- Yes                       No

25. After reflecting on your cooking practices and habits, how would you rate your diet?

Make last question

## Cooking Survey for Community Based Health and Needs Assessment

- Excellent     Very Good  
 Good     Fair     Poor

The following questions represent statements people have made about their food situation.

26. Which of these statements best describes the food eaten in your household in the last 12 months ?

- Enough of the kinds of food we want to eat
- Enough but not always the kinds of food we want
- Sometimes not enough to eat
- Often not enough to eat
- DK or Refused

27. I (or we) were worried whether my (or our) food would run out before I (or we) got money to buy more.” Was that often true, sometimes true, or never true for (you/your household) in the last 12 months?

- Often true
- Sometimes true
- Never true
- DK or Refused

28. The food that I (or we) bought just didn't last, and I (or we) didn't have money to get more.” Was that often, sometimes, or never true for (you/your household) in the last 12 months?

- Often true
- Sometimes true
- Never true
- DK or Refused

## Cooking Survey for Community Based Health and Needs Assessment

29. I (or we) couldn't afford to eat balanced meals. Was that often, sometimes, or never true for you ( or your household) in the last 12 months?

- Often true
- Sometimes true
- Never true
- DK or Refused

30. In the last 12 months from the current month, did you (you or other adults in your household) ever cut the size of your meals or skip meals because there wasn't enough money for food?

- Yes
- No (Skip AD1a)
- Don't know (Skip AD1a)

31. If yes above, how often did this happen—almost every month, some months but not every month, or in only 1 or 2 months?

- Almost every month
- Some months but not every month
- Only 1 or 2 months
- Don't know

32. In the last 12 months, did you ever eat less than you felt you should because there wasn't enough money for food?

- Yes
- No
- Don't know

## Cooking Survey for Community Based Health and Needs Assessment

33. In the last 12 months, were you every hungry but didn't eat because there wasn't enough money for food?

- Yes
- No
- Don't know

34. In the last 12 months, did you lose weight because there wasn't enough money for food?

- Yes
- No
- Don't know

35. In the last 12 months, did you (or other adults in your household) ever not eat for a whole day because there wasn't enough money for food?

- Yes
- No (Skip AD5a)
- Don't know

36. If you answered yes above, how often did this happen—almost every month, some months but not every month, or in only 1 or 2 months?

- Almost every month
- Some months but not every month
- Only 1 or 2 months
- Don't know
